# Supplementary material for: Icaritin ameliorates RANKL-mediated osteoclastogenesis and ovariectomy-induced osteoporosis
Source: publisher site journal article supplement (doi:10.18632/aging.205068), 2023-10-03
Supplement: Supplementary file [file aging-v15i19-205068-supplementary-material-SD1.pdf]

SUPPLEMENTARY FIGURE

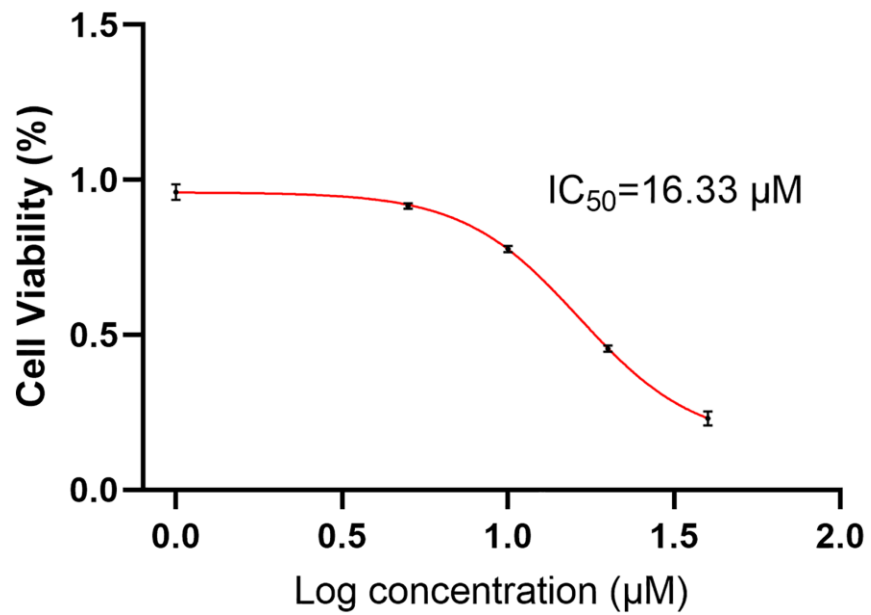

Supplementary Figure 1. The IC<sub>50</sub> concentrations of icaritin detected in BMMs.
